# Supplementary material for: Accumulation of supramolecular nanoparticles self-assembled from a bola-shaped cytidylic acid-appended fluorescein dye in cell nuclei
Source: Royal Society of Chemistry journal article supplement (doi:10.1039/c4cc03733b), 2014-01-01
Supplement: c4cc03733b1.pdf [file c4cc03733b1.pdf]

1 *Supplementary Information*

2

3 **Accumulation of Supramolecular Nanoparticles**  
4 **Self-Assembled from a Bola-Shaped Cytidylic Acid-Appended**  
5 **Fluorescein Dye into Cell Nucleus**

6

7 Rika Iwaura <sup>a, \*</sup>, Mutsumi Shirai <sup>a</sup>, Kaname Yoshida <sup>b</sup>, and Mayumi  
8 Ohnishi-Kameyama <sup>a</sup>

9

10 <sup>a</sup> National Food Research Institute, National Agriculture and Food Research  
11 Organization, 2-1-12 Kannondai, Tsukuba, Ibaraki 305-8642 Japan

12 TEL: +81-29-838-7089; FAX: +81-29-838-7996

13 E-MAIL: riwaura@affrc.go.jp

14 <sup>b</sup> Japan Fine Ceramics Center, 2-4-1 Mutsuno, Atsuta, Nagoya, 456-8587 Japan

15

16 \*Corresponding Author

17

18 **Materials and general methods:** Fluorescein was purchased from Kishida Chemical  
19 Co. (Osaka, Japan), and 5-bromo-1-pentanol, potassium carbonate, and sodium  
20 borohydride were purchased from Tokyo Chemical Industry (Tokyo, Japan).  
21 *N*-Benzoyl-3'-*O*-[2-cyanoethoxy(*N,N*-diisopropylamino)phosphino]-5'-*O*-(4,4'-dimetho  
22 xytrityl)cytidine was purchased from Applied Biosystems (Tokyo, Japan). The  
23 structures of the intermediates and the final products were confirmed by Fourier  
24 transform infrared (FTIR) spectroscopy, proton nuclear magnetic resonance  
25 spectroscopy (<sup>1</sup>H NMR), and electrospray ionization Fourier-transform ion cyclotron  
26 resonance mass spectrometry (ESI FTICR-MS) or electrospray ionization  
27 Fourier-transform orbitrap mass spectrometry (ESI FTMS). <sup>1</sup>H NMR spectra were  
28 recorded on a Bruker Advance 400 spectrometer (Bruker BioSpin, MA, U.S.A.). FTIR  
29 measurements were performed with a Spectrum One spectrometer (Perkin-Elmer, MA,  
30 U.S.A.). Mass experiments were performed with an Apex II 70e mass spectrometer  
31 (Bruker Daltonics, MA, U.S.A.) or an Orbitrap Veros Pro ETD mass spectrometer  
32 (Thermo Fisher Scientific, MA, U.S.A.). Fluorescence spectra were recorded on an  
33 RF-5300 spectrofluorometer (Shimadzu, Kyoto, Japan).

34

35 **Synthesis of bis-(5-hydroxypentyloxy)fluorescein:** A mixture of fluorescein (3.2 g, 10  
36 mmol) and potassium carbonate (6.9 g) in 200 mL of dimethyl formamide was warmed  
37 until complete dissolution had occurred. 5-Bromo-1-pentanol (7.4 g, 45 mmol) was then  
38 added over 20 min. The reaction mixture was refluxed for 12 h and cooled to room  
39 temperature, and the solvent was evaporated under reduced pressure. Water was added  
40 to the remaining solid, and the aqueous layer was extracted with dichloromethane. The  
41 collected dichloromethane extract was dried with magnesium sulfate overnight and

42 filtered. Fractionation by gel permeation chromatography with chloroform and  
43 subsequent evaporation of the solvent gave bis-(5-hydroxypentyloxy)fluorescein as an  
44 orange oil (2.5 g, 50% pure, 5 mmol). Thin layer chromatography (TLC): (silica gel,  
45 chloroform/methanol = 4/1, v/v)  $R_f = 0.78$ .  $^1\text{H NMR}$ : (400 MHz in  $\text{CDCl}_3$  at 25 °C)  $\delta$   
46 1.5–1.6 (m, 4 H, c), 1.6–1.7 (m, 4 H, d), 1.8–1.9 (m, 4 H, b), 3.6–3.7 (t, 4 H, e), 6.6 (dd,  
47  $J = 9.7$  and 1.9 Hz, 1 H, g), 6.75 (d,  $J = 1.8$  Hz, 1 H, f), 6.9 (d,  $J = 6.6$  Hz, 1 H, h), 7.3  
48 (dd,  $J = 7.6$  and 1.1, 1 H, l), 7.7 (dt,  $J = 7.6$  and 1.4 Hz, 1 H, j), 7.7 (dt,  $J = 7.5$  and 1.5  
49 Hz, 1 H, k), 8.3 (dd,  $J = 7.7$  and 1.4 Hz, 1 H, i). ESI-FTMS ( $m/z$ ): Calcd for  $\text{C}_{30}\text{H}_{33}\text{O}_7^+$   
50  $[\text{M}+\text{H}]^+$ , 505.2221; Found, 505.2217.

51

52 **Synthesis of bis[5-(3'-cytidyloxy)pentyloxy]fluorescein (C-FLU-C):** C-FLU-C was  
53 synthesized as previously described with slight modifications (R. Iwaura et al. *Chem.*  
54 *Mater.* **2002**, *14*, 3047.). Dried tetrahydrofuran (THF, 60 mL) was added to 1.0 g (1.2  
55 mmol) of *N*-benzoyl-3'-*O*-[2-cyanoethoxy(*N,N*-diisopropylamino)phosphino]-5'-*O*-(4,4'-dimetho  
56 xytrityl)cytidine, and the solution was mixed with  
57 3,6-bis-(5-hydroxypentyloxy)fluorescein (250 mg, 0.5 mmol) and 1*H*-tetrazole (0.2 g,  
58 2.8 mmol) and stirred for 3 days. To this reaction mixture, 0.3 mL of 70%  
59 *t*-butylhydroperoxide aqueous solution was added and the mixture was stirred for 1 h.  
60 The solution in the reaction mixture was evaporated under reduced pressure, the residue  
61 was purified by gel permeation chromatography with chloroform as the eluent followed  
62 by the evaporation of the solvent. The protecting cyanoethyl group of the residue was  
63 removed by mixing with 4 mL of 25% aqueous ammonia and 20 mL of methanol for  
64 1.5 h at 50 °C and 24 h at room temperature and then evaporating the solvent. The  
65

66 resulting residue was treated with a chloroform solution containing 5% trifluoroacetic  
67 acid to remove the protecting dimethoxytrityl group. After the removal of the solvent,  
68 the residual solid was reprecipitated from acetone, and the precipitate was filtered and  
69 dried. The final compound, **C-FLU-C**, was obtained as a yellow powder (110 mg, 20%  
70 pure). TLC: (silica gel, chloroform/methanol = 4/1, v/v)  $R_f = 0.1$ .  $^1\text{H NMR}$ : (400 MHz  
71 in dimethyl sulfoxide- $d_6$  at 25 °C)  $\delta$  1.5–1.6 (m, 4 H, c), 1.6–1.7 (m, 4 H, d), 1.8–1.9 (m,  
72 4 H, b), 2.0–2.3 (br, 4 H, 2'-H), 3.5 (d,  $J = 3.8$  Hz, 4 H, 5'H), 3.6–3.7 (br, 4 H, e),  
73 3.8–3.9 (br, 4H, a) 4.5 (br, 2 H, 4'), 5.7 (br, 2 H, 5-H), 6.1 (t,  $J = 6.5$  Hz, 2 H, 1'-H), 6.5  
74 (dd,  $J = 9.7$  and 1.9 Hz, 2 H, g), 6.6 (d,  $J = 1.8$  Hz, 2 H, f), 6.7 (br, 2 H, h), 6.8 (br, 1 H,  
75 l), 7.0 (br, 1 H, j), 7.2 (br, 1 H, k), 7.4 (m, 1 H, i) 7.7 (d,  $J = 7.8$  Hz, 2 H, 6-H), 7.8 (m,  
76 4-NH<sub>2</sub>). IR:  $\nu$  (cm<sup>-1</sup>) = 3191, 3069, 2945, 1701, 1645, 1600, 1496, 1471, 1427, 1372,  
77 1330, 1281, 1177, 1103, 1056, 1001, 951, 827, 782, 759. ESI FTICR-MS ( $m/z$ ): Calcd  
78 for C<sub>48</sub>H<sub>55</sub>N<sub>6</sub>O<sub>19</sub>P<sub>2</sub><sup>-</sup> [M-H]<sup>-</sup>, 1081.3003; Found, 1081.3015. mp = 177 °C.  
79

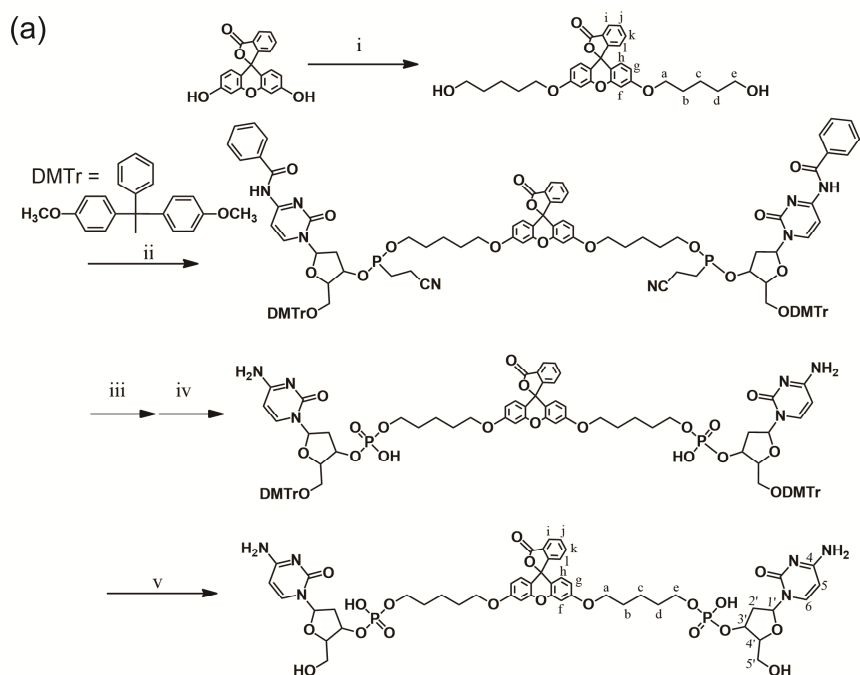

CPLUC

BRUKER

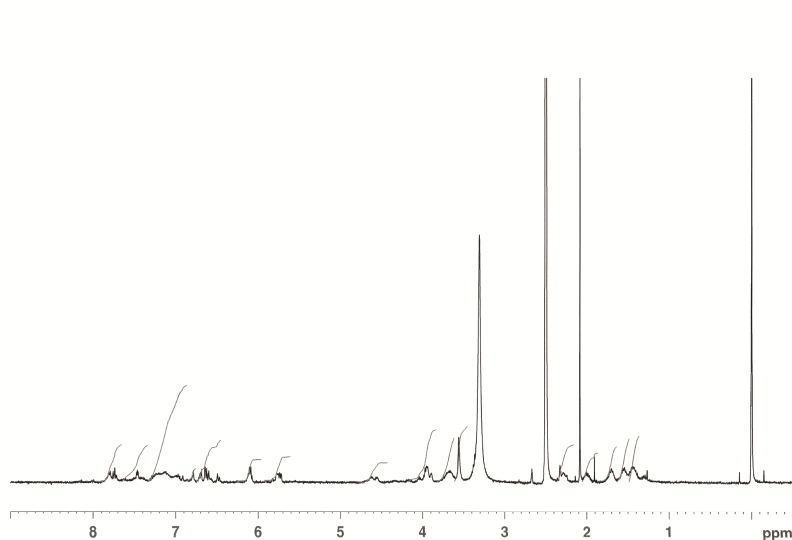

80

81 Fig. S1 (a) Synthesis of bis[5-(3'-cytididyloxy)pentyl]oxy]fluorescein (**C-FLU-C**): (i)  
 82  $K_2CO_3$ ,  $Br-(CH_2)_5OH$ ; (ii) *N*-benzoyl-3'-*O*-[2-cyanoethoxy(*N*,  
 83 *N*-diisopropylamino)phosphino]-5'-*O*-(4,4'-dimethoxytrityl)cytidine, 1*H*-tetrazol, THF;  
 84 (iii) *t*-butylhydroperoxide; (iv) 25% aqueous ammonia solution; (v) trifluoroacetic acid.  
 85 (b)  $^1H$  NMR spectrum of **C-FLU-C**.

86 **Atomic force and transmission electron microscopic (AFM and TEM) observations**  
87 **of the nanoparticles:** For the AFM observation, 1  $\mu\text{L}$  of the aqueous solution  
88 containing **C-FLU-C** ( $[C] = 2 \times 10^{-3}$  mol/L) was placed on a sheet of highly ordered  
89 pyrolytic graphite and dried in air for a few minutes. The specimen was then washed  
90 with excess cold Milli-Q water and blotted with filter paper. Tapping-mode AFM was  
91 carried out with a NanoNavi station and an S-image system ( $1024 \times 1024$  pixels; SII  
92 Nanotechnology, Tokyo, Japan) and a silicon microcantilever (spring constant = 40  
93  $\text{Nm}^{-1}$ , frequency = 120 kHz, aluminum coated, SII Nanotechnology). For the TEM  
94 observation, the aqueous solution containing **C-FLU-C** was diluted 100 times. A drop  
95 of the diluted solution was put on an elastic carbon-supporting film, dried at room  
96 temperature, and then subjected to TEM observation with an H-9500 300 kV  
97 transmission electron microscope (Hitachi High Technologies, Tokyo, Japan) and a  
98 CCD camera (AMT Corp. ER-B, Woburn, MA).

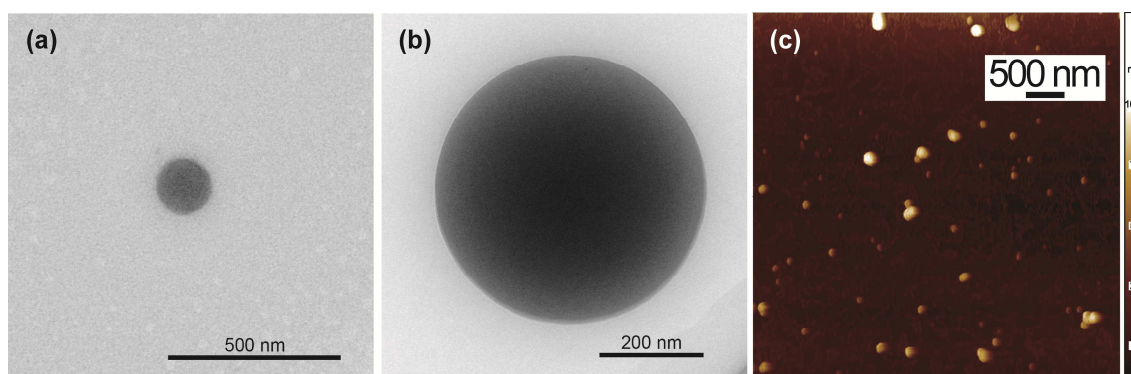

100 Fig. S2 (a,b) Transmission electron microscopic images and (c) atomic force  
101 microscopic images of self-assembled **C-FLU-C** nanoparticles in aqueous solution.

102 **Particle size distribution measurement:** The particle size distribution of  
103 self-assembled **C-FLU-C** nanoparticles in aqueous solution ( $[C] = 4 \times 10^{-4}$  mol/L) was  
104 analyzed with a Zetasizer (Malvern Instruments, UK) at 20  $^{\circ}\text{C}$ .

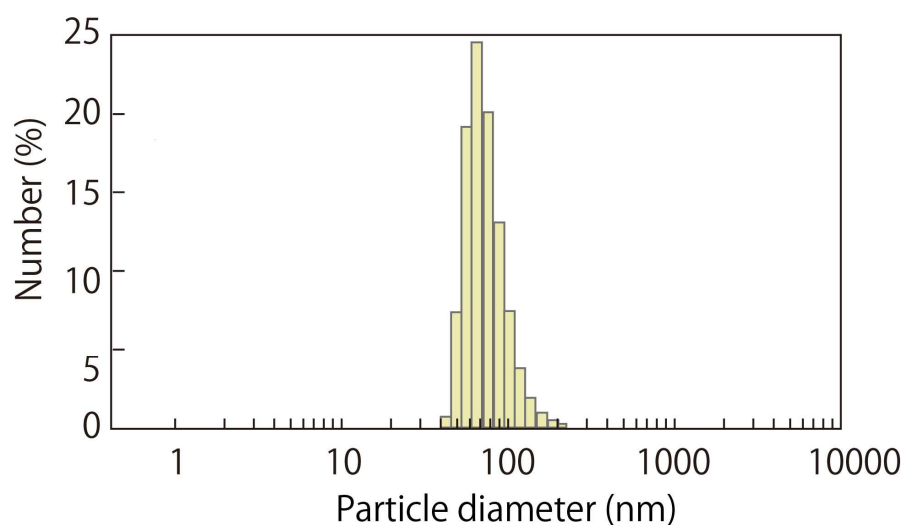

105

106 Fig. S3 Particle size distribution of self-assembled **C-FLU-C** nanoparticles in aqueous

107 solution.

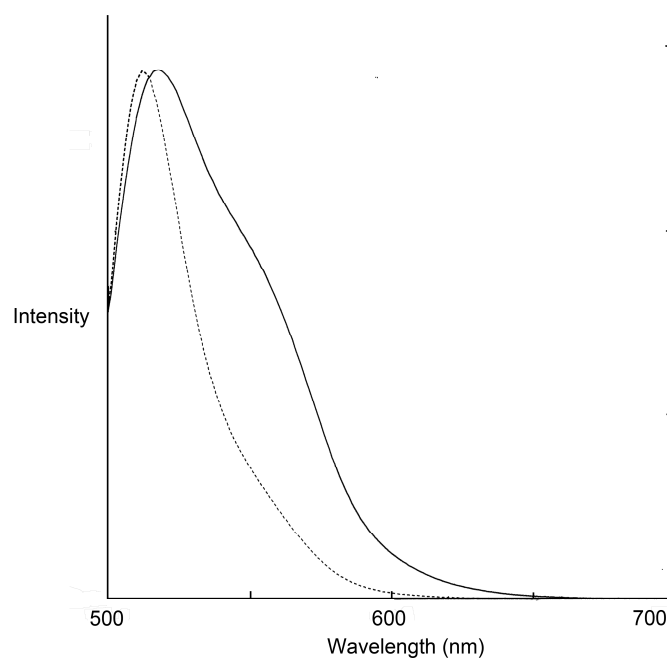

108

109 Fig. S4 Normalized emission spectra of fluorescein (---) and **C-FLU-C** (—) in Tris-HCl

110 buffer (pH = 8) at 25 °C ( $[C] = 2 \times 10^{-6}$  M, Ex. = 480 nm).

111

112 **Cell cultures:** Caco-2 cells (human colon carcinoma cell line) and BALB/3T3 cells

113 (contact-inhibited seminormal cell line: mouse embryo cell line) were obtained from

114 RIKEN Cell Bank (Tsukuba, Japan) and were used to examine the uptake  
115 characteristics of self-assembled **C-FLU-C** nanoparticles. An aqueous solution of  
116 **C-FLU-C** was added to both cell lines after 1 day of culture, and the concentration was  
117 adjusted to  $2 \times 10^{-6}$  mol/L. Both cell lines were cultured in culture medium containing  
118 antibiotics (Wako Pure Chemical Industries, Tokyo, Japan), non-essential amino acids  
119 (GIBCO Life Technologies, CA, U.S.A.), and 10% fetal bovine serum (FBS, Sigma  
120 Aldrich, MO, U.S.A.). Dulbecco's modified Eagle's medium and Eagle's minimal  
121 essential medium (both GIBCO Life Technologies) were used as the culture medium for  
122 the Caco-2 and BALB/3T3 cells, respectively. The culture medium was changed at 3, 7,  
123 and 10 days of cell culture. Cells were grown in T25 tissue culture flasks (Falcon,  
124 Corning Incorporated Life Sciences, MA, U.S.A.) at 37 °C in 100% humidity and 5%  
125 CO<sub>2</sub> and were passaged when they reached near confluency.

126 As references, the experiments were repeated by using fluorescein instead of  
127 **C-FLU-C**. Fluorescein was dissolved in a trace amount of dimethyl sulfoxide, and the  
128 concentration of fluorescein was adjusted to  $5 \times 10^{-6}$  mol/L by using water.

129

130 **Measurements of cell growth curves:** Caco-2 or BALB/3T3 cells were cultured in  
131 **C-FLU-C**-containing medium in 12-well plates and were treated with 0.025% trypsin  
132 solution after 1–14 days incubation. Cultured cell suspensions were collected by  
133 centrifugation (100 ×g, 3 min) and washed with phosphate buffered saline (PBS) several  
134 times before the cells were counted.

135 As references, both cell lines were cultured, and the cells were counted without the  
136 addition of **C-FLU-C**. Cytotoxicity and the median lethal dose (LD<sub>50</sub>) of **C-FLU-C** on



137 Caco-2 cells were determined with a WST-1 cell proliferation assay system (Takara,  
138 Shiga, Japan).

139

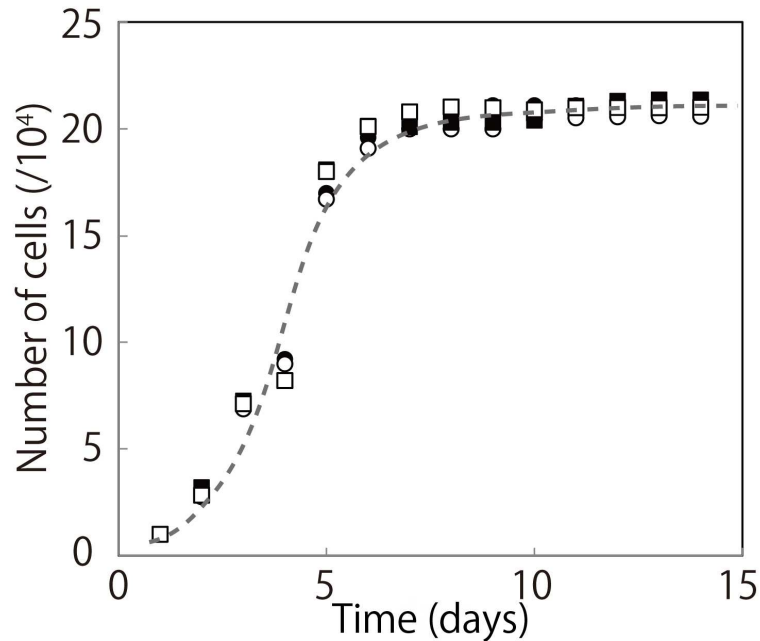

140

141 Fig. S5 Cell growth curves of Caco-2 cells (○), Caco-2 cells + C-FLU-C (●),  
142 BALB/3T3 cells (□), and BALB/3T3 cells + C-FLU-C (■). [C-FLU-C] =  $2 \times 10^{-6}$   
143 mol/L. Median lethal dose (LD<sub>50</sub>) =  $3.5 \times 10^{-3}$  mol/L.

144

145 **Optical and laser-scanning confocal microscopic observations and flow cytometric**

146 **analysis of cells:** Cells cultured with C-FLU-C nanoparticles were washed with PBS

147 and harvested by adding a trypsin/ethylenediaminetetraacetic acid mixture (Wako).

148 Trypsin was inactivated with a mixture of culture medium and FBS, and cells were

149 resuspended in PBS and collected by centrifugation (100 ×g, 3 min). The collected cells

150 were washed three times with PBS and resuspended in PBS, and the suspension was

151 subjected to optical microscopic measurements and flow cytometric analysis.

152 Fluorescence microscopic images were obtained with an optical microscope (BX51;  
153 Olympus, Tokyo, Japan) equipped with a 40× objective lens, a 10× ocular lens  
154 (Olympus), band-pass filters (510–550 nm Olympus), and a 3-CCD video camera  
155 (CS520MD; Olympus). Laser-scanning confocal microscopic observations of cells were  
156 performed on a TCS SP8 system (Leica Microsystems, Tokyo, Japan) with a visible  
157 semiconductor laser operating at a wavelength of 488 nm and a fluorescence filter cube  
158 (I3). Flow cytometry experiments were carried out on an EC800 flow cytometry  
159 analyzer (Sony, Tokyo, Japan). Cells containing **C-FLU-C** were excited at 488 nm, and  
160 fluorescence signals from individual cells were collected through a band-pass filter  
161 (500–550 nm). Flow cytometric histograms were constructed for  $1 \times 10^4$  cells in each  
162 experiment.

163

164

165

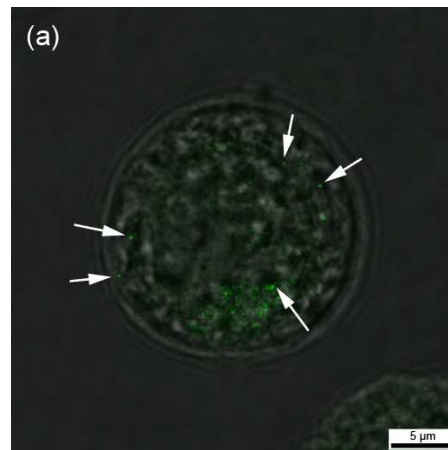

166

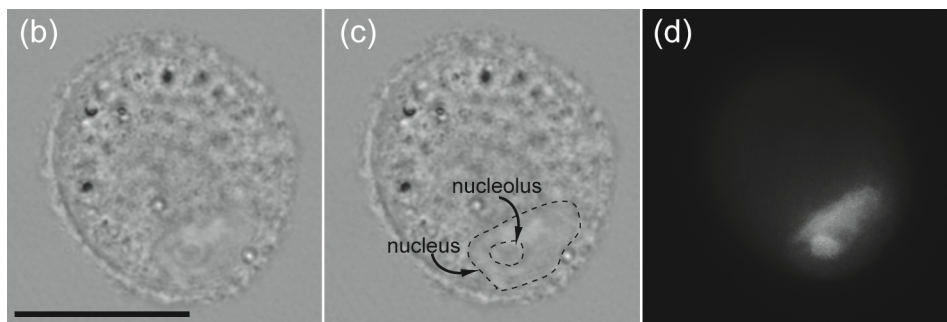

167

168 Fig. S6 (a) Composite image of fluorescence and bright field images of a Caco-2 cell  
169 cultured for 4 days with C-FLU-C obtained by using a laser-scanning confocal  
170 microscope. Arrows indicate fluorescent particles. Microscopic images of a Caco-2 cell  
171 cultured for 7 days with C-FLU-C for (b, c) a light field image, and (d) a fluorescence  
172 microscopic image. Bar = 20  $\mu\text{m}$ .

173

174 **Adsorption of C-FLU-C on nucleosomes:** Cell cultures were treated with colcemid  
175 (Sigma; final concentration = 0.04 mg/mL) for 2 h. After colcemid treatment, the cell  
176 cultures were trypsinized and suspended in culture medium. The cell suspensions were  
177 then collected by centrifugation (100  $\times g$ , 5 min), washed several times with PBS, and

178 then, as a hypotonic treatment, stirred in 0.075 mol/L KCl solution containing  $2 \times 10^{-6}$   
179 mol/L **C-FLU-C** for 25 min. Sediments were collected by centrifugation ( $150 \times g$ , 10  
180 min, at 4 °C), fixed in methanol–acetic acid (3/1 = v/v, on ice), and dried on a slide  
181 glass. Fluorescence microscopic images of the treated nucleosomes were obtained by  
182 using the method described above.

183

184

185

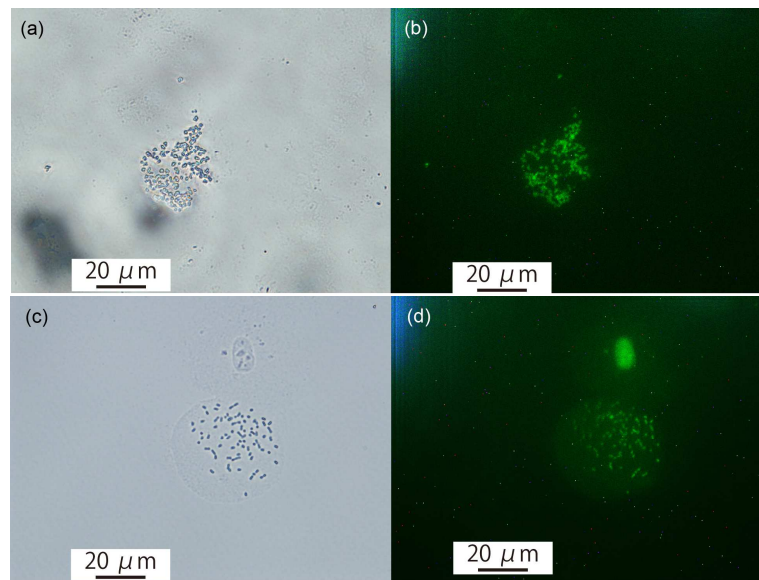

186

187 Fig. S7 Light (left) and fluorescence (right) microscopic images of chromosomes of  
188 Caco-2 cells (a, b) and BALB/3T3 cells (c, d) cultured for 2 days in the presence of  
189 **C-FLU-C**. Prior to observation, cells were treated with colcemid.
